# Supplementary material for: Root-to-Shoot Long-Distance Mobile miRNAs Identified from Nicotiana Rootstocks
Source: MDPI journal article supplement (doi:10.3390/ijms222312821), 2021-11-26
Supplement: s1 [file s1]

(A)

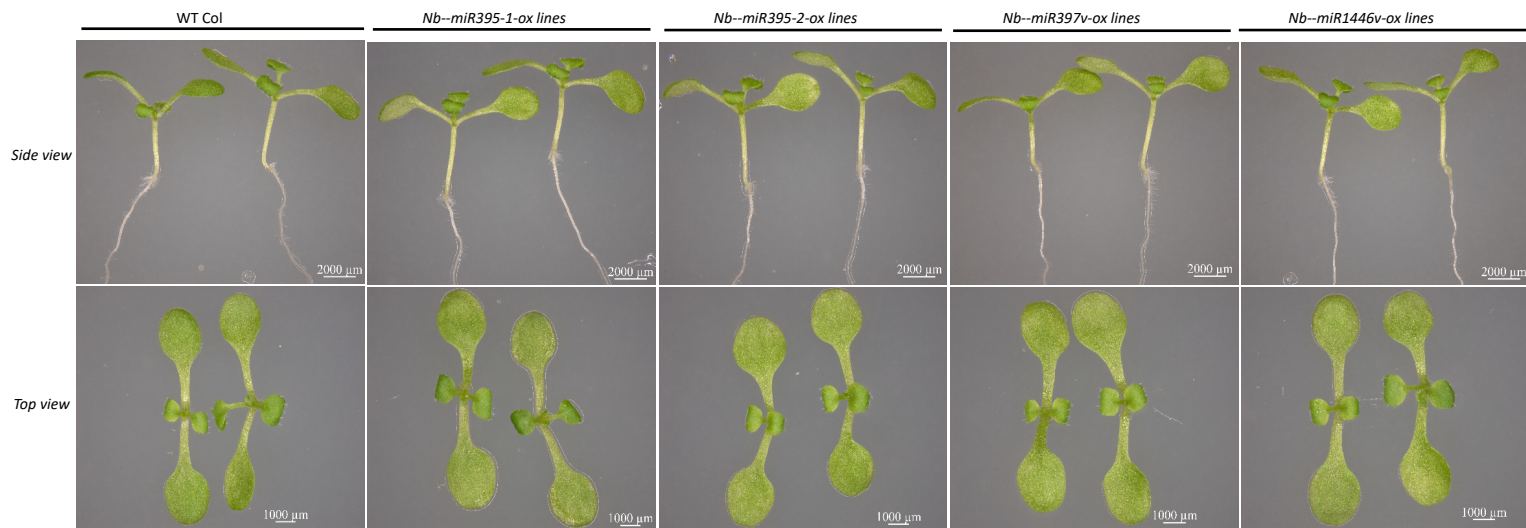

(B)

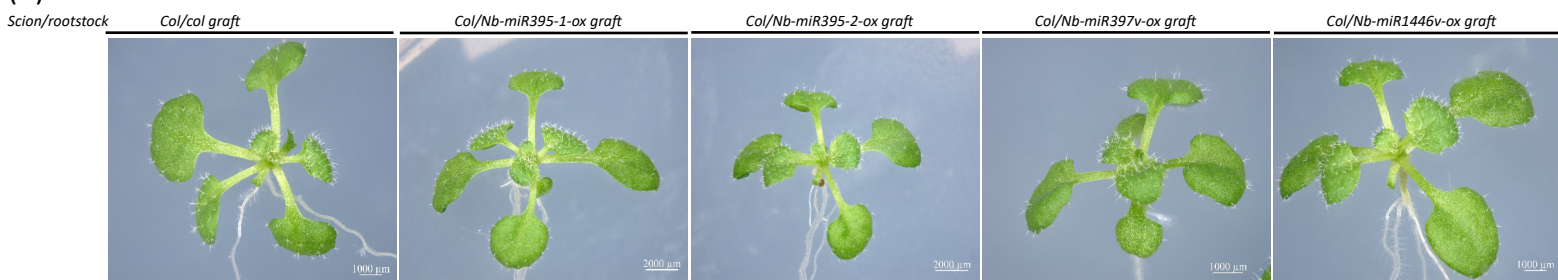

Figure S2. Growth phenotypes of *Arabidopsis* overexpressing lines of *Nb-miR395-1*, *Nb-miR395-2*, *Nb-miR397v* and *Nb-miR1446v* (A), and the grafting phenotype by using wild *Col-0* as scion and these overexpressing lines as rootstock respectively.
