# Supplementary material for: Root-to-Shoot Long-Distance Mobile miRNAs Identified from Nicotiana Rootstocks
Source: MDPI journal article supplement (doi:10.3390/ijms222312821), 2021-11-26
Supplement: s1 [file s1]

**Table S6. Primers used in this study.**

| Name                 | Sequence(5'-3')                                     |
|----------------------|-----------------------------------------------------|
| <b>For Stem-loop</b> |                                                     |
| U6                   | GTGCAGGGTCCGAGGTTTGGACCATTCTCGAT                    |
| ath-miR158a-3p       | GTCGTATCCAGTGCAGGGTCCGAGGTATTCGCACTGGATACGACTGCTTT  |
| ath-miR846-3p        | GTCGTATCCAGTGCAGGGTCCGAGGTATTCGCACTGGATACGACAATTCA  |
| ath-miR398b-3p       | GTCGTATCCAGTGCAGGGTCCGAGGTATTCGCACTGGATACGACCAGGGG  |
| ath-miR161.1         | GTCGTATCCAGTGCAGGGTCCGAGGTATTCGCACTGGATACGACACCCCG  |
| ath-miR156b-3p       | GTCGTATCCAGTGCAGGGTCCGAGGTATTCGCACTGGATACGACACTGAC  |
| ath-miR399a          | GTCGTATCCAGTGCAGGGTCCGAGGTATTCGCACTGGATACGACCAGGGC  |
| ath-miR163           | GTCGTATCCAGTGCAGGGTCCGAGGTATTCGCACTGGATACGACATCGAA  |
| Nb-miR395-1          | GTCGTATCCAGTGCAGGGTCCGAGGTATTCGCACTGGATACGACAGAGTT  |
| Nb-miR395-2          | GTCGTATCCAGTGCAGGGTCCGAGGTATTCGCACTGGATACGACC GGAGT |
| Nb-miR156            | GTCGTATCCAGTGCAGGGTCCGAGGTATTCGCACTGGATACGACGCCCCAC |
| Nb-miR397            | GTCGTATCCAGTGCAGGGTCCGAGGTATTCGCACTGGATACGACTCATCA  |
| Nb-miR164            | GTCGTATCCAGTGCAGGGTCCGAGGTATTCGCACTGGATACGACGCATGT  |
| Nb-miR1446           | GTCGTATCCAGTGCAGGGTCCGAGGTATTCGCACTGGATACGACATTGAG  |
| <b>For qRT-PCR</b>   |                                                     |
| U6-F                 | GGAACGATACAGAGAAGATTAGCA                            |
| U6-R                 | GTGCAGGGTCCGAGGT                                    |
| ath-miR158a-3p-F     | GCGCGTCCCAAATGTAGAC                                 |
| ath-miR158a-3p-R     | AGTGCAGGGTCCGAGGTATT                                |
| ath-miR846-3p-F      | GCGCGTTGAATTGAAGTGCT                                |
| ath-miR846-3p-R      | AGTGCAGGGTCCGAGGTATT                                |
| ath-miR398b-3p-F     | CGCGTGTTCTCAGGTCA                                   |
| ath-miR398b-3p-R     | AGTGCAGGGTCCGAGGTATT                                |
| ath-miR161.1-F       | CGCGCGTGAAAGTGACTACAT                               |
| ath-miR161.1-R       | AGTGCAGGGTCCGAGGTATT                                |
| ath-miR156b-3p-F     | CGCGTGCTCACCTCTCTTTCT                               |
| ath-miR156b-3p-R     | AGTGCAGGGTCCGAGGTATT                                |
| ath-miR399a-F        | CGCGTGCCAAAGGAGATTT                                 |
| ath-miR399a-R        | AGTGCAGGGTCCGAGGTATT                                |
| ath-miR163-F         | GCGTTGAAGAGGACTTGGAAC                               |
| ath-miR163-R         | AGTGCAGGGTCCGAGGTATT                                |
| Nb-miR395-1-F        | CGCTGAAGTGTTTGGGGG                                  |
| Nb-miR395-1-R        | AGTGCAGGGTCCGAGGTATT                                |
| Nb-miR395-2-F        | CGCTGAAGTGTTTGGGGGA                                 |
| Nb-miR395-2-R        | AGTGCAGGGTCCGAGGTATT                                |
| Nb-miR156-F          | CGCGCGTGACAGAAGAGA                                  |
| Nb-miR156-R          | AGTGCAGGGTCCGAGGTATT                                |
| Nb-miR397-F          | GCGTCATTGAGTGCAGCGT                                 |
| Nb-miR397-R          | AGTGCAGGGTCCGAGGTATT                                |
| Nb-miR164-F          | GCGTGGAGAAGCAGGGC                                   |

|              |                      |
|--------------|----------------------|
| Nb-miR164-R  | AGTGCAGGGTCCGAGGTATT |
| Nb-miR1446-F | GCGCGTTCTGAACTCTCTCC |
| Nb-miR1446-R | AGTGCAGGGTCCGAGGTATT |

**For overexpression**

|                  |                                                   |
|------------------|---------------------------------------------------|
| Nb-miR395-1-ox-F | CTGATTAACAGCTCGCAATTGCCAAGTTCAATCCGATCAAAATG      |
| Nb-miR395-1-ox-R | CTTACTCAGTTAGGTCTACAGGAACCTGATCAATAGCATATACG      |
| Nb-miR395-2-ox-F | CTGATTAACAGCTCGCAATTGGGGTAAGCTGTCTATATCACCCCT     |
| Nb-miR395-2-ox-R | CTTACTCAGTTAGGTCTACTAAGCTCCCTTCGAAATTCCA          |
| Nb-miR397-ox-F   | CTGATTAACAGCTCGCAATTGGGTGCACATTACAGGTTCAAATCT     |
| Nb-miR397-ox-R   | CTTACTCAGTTAGGTCAAAATGTACTACTTGAAAGCTCTAATGTACTAT |
| Nb-miR164-ox-F   | CTGATTAACAGCTCGCAATTGATTTTACGCTAACCATCAACCTACTAA  |
| Nb-miR164-ox-R   | CTTACTCAGTTAGGTCTAGTCATTCAAGATTGATTCTTCTAAATAGC   |
| ath-miR163-ox-F  | CTGATTAACAGCTCGCAATTGAGCATAGGTCTTGATTGGTGGAA      |
| ath-miR163-ox-R  | CTTACTCAGTTAGGTACCTAGAAACCATATTTTCAGGC            |

**For RT-PCR**

|                   |                                                  |
|-------------------|--------------------------------------------------|
| Nb-miR395-1-ox-F1 | CTGATTAACAGCTCGCAATTGCCAAGTTCAATCCGATCAAAATG     |
| Nb-miR395-1-ox-R1 | CTTACTCAGTTAGGTCTACAGGAACCTGATCAATAGCATATACG     |
| Nb-miR395-1-ox-F2 | TTCCCCCTAGAGTTCTCCTGA                            |
| Nb-miR395-1-ox-R2 | CAGAGTTCCCCCAAACACTTC                            |
| Nb-miR395-2-ox-F1 | CTGATTAACAGCTCGCAATTGGGGTAAGCTGTCTATATCACCCCT    |
| Nb-miR395-2-ox-R1 | CTTACTCAGTTAGGTCTACTAAGCTCCCTTCGAAATTCCA         |
| Nb-miR395-2-ox-F2 | GGTTTCGCCTAGAGTTCTCCT                            |
| Nb-miR395-2-ox-R2 | CGGAGTTCCCCCAAACAC                               |
| Nb-miR164-ox-F1   | CTGATTAACAGCTCGCAATTGATTTTACGCTAACCATCAACCTACTAA |
| Nb-miR164-ox-R1   | CTTACTCAGTTAGGTCTAGTCATTCAAGATTGATTCTTCTAAATAGC  |
| Nb-miR164-ox-F2   | TTTCGAAGCGCCTTAAACAG                             |
| Nb-miR164-ox-R2   | TTAGCATGTGCCCTGCTTCT                             |
| ath-miR163-ox-F1  | CTGATTAACAGCTCGCAATTGAGCATAGGTCTTGATTGGTGGAA     |
| ath-miR163-ox-R1  | CTTACTCAGTTAGGTACCTAGAAACCATATTTTCAGGC           |
| ath-miR163-ox-F2  | TGCGCAGTGCTTAAATCGTA                             |
| ath-miR163-ox-R2  | CCATATTTTCAGGCACAACC                             |

**For confocal**

|                     |                                                   |
|---------------------|---------------------------------------------------|
| Nb-miR395-1-SL24-F1 | TAATTCTCGAGTGTGCCCAAGTTCAATCCGATCAAAATG           |
| Nb-miR395-1-SL24-R1 | CTTACTCAGTTAGGTCTACAGGAACCTGATCAATAGCATATACG      |
| Nb-miR395-1-SL24-F2 | TAATTCTCGAGTGTGCTTCCCCCTAGAGTTCTCCTGAAT           |
| Nb-miR395-1-SL24-R2 | CTTACTCAGTTAGGTCCAGAGTTCCCCCAAACACTTCA            |
| Nb-miR397-SL24-F1   | TAATTCTCGAGTGTGCGGTGCACATTACAGGTTCAAATCT          |
| Nb-miR397-SL24-R1   | CTTACTCAGTTAGGTCAAAATGTACTACTTGAAAGCTCTAATGTACTAT |
| Nb-miR397-SL24-F2   | TAATTCTCGAGTGTGCTTTTCATCAACGCTGCACTCA             |
| Nb-miR397-SL24-R2   | CTTACTCAGTTAGGTCCGATGATTGATTCTTATATTAACAAA        |
| Nb-miR164-SL24-F1   | TAATTCTCGAGTGTGCATTTTACGCTAACCATCAACCTACTAA       |

|                   |                                                |
|-------------------|------------------------------------------------|
| Nb-miR164-SL24-R1 | CTTACTCAGTTAGGTCAGTCATTCAAGATTGATTCTTCTAAATAGC |
| Nb-miR164-SL24-F2 | TAATTCTCGAGTGTGCTTTTCGAAGCGCCTTAAACAGA         |
| Nb-miR164-SL24-R2 | CTTACTCAGTTAGGTCTTAGCATGTGCCCTGCTTCTC          |
| GUS-SL24-F        | TAATTCTCGAGTGTGCAATTGGTGTGAACAACGAACTGAACTGGC  |
| GUS-SL24-R        | CTTACTCAGTTAGGTCACTGCCACTGACCGGATGC            |
| FT-SL24-SL24-F    | AATTCTCGAGTGTGCACAAATTAAAGAAGCAGAAAC           |
| FT-SL24-SL24-R    | TTACTCAGTTAGGTCAATTGATAGGCATCATCACCGTTC        |

**For Golden Gate Cloning**

|              |                                                                |
|--------------|----------------------------------------------------------------|
| Nb-miR164 P1 | TAATTCTCGAGTGTGCGGTCTCTGGAGAAGCAGGGCACATGCGTGTGAACAACGAACTGAAC |
| Nb-miR164 P2 | GGTCTCTCCGTAAAGAAATCATGGAAGTA                                  |
| Nb-miR164 P3 | GGTCTCCGGATGGAGAAGCAGGGCACATGCCTATGCCGGAATCCATCGCA             |
| Nb-miR164 P4 | GGTCTCTCCGGTGGTTACAGTCTTGCGCGA                                 |
| Nb-miR164 P5 | GGTCTCCGGATGGAGAAGCAGGGCACATGCGCGTCTGTTGACTGGCAGGT             |
| Nb-miR164 P6 | GGTCTCTCCGTCCCGCTAGTGCCTTGTTCA                                 |
| Nb-miR164 P7 | GGTCTCCGGATGGAGAAGCAGGGCACATGCCTTTGCAAGTGGTGAATCCG             |
| Nb-miR164 P8 | CTTACTCAGTTAGGTTCGGTCTCGGGTAGATATCACACTCTGT                    |

---
