# Supplementary material for: Root-to-Shoot Long-Distance Mobile miRNAs Identified from Nicotiana Rootstocks
Source: MDPI journal article supplement (doi:10.3390/ijms222312821), 2021-11-26
Supplement: s1 [file s1]

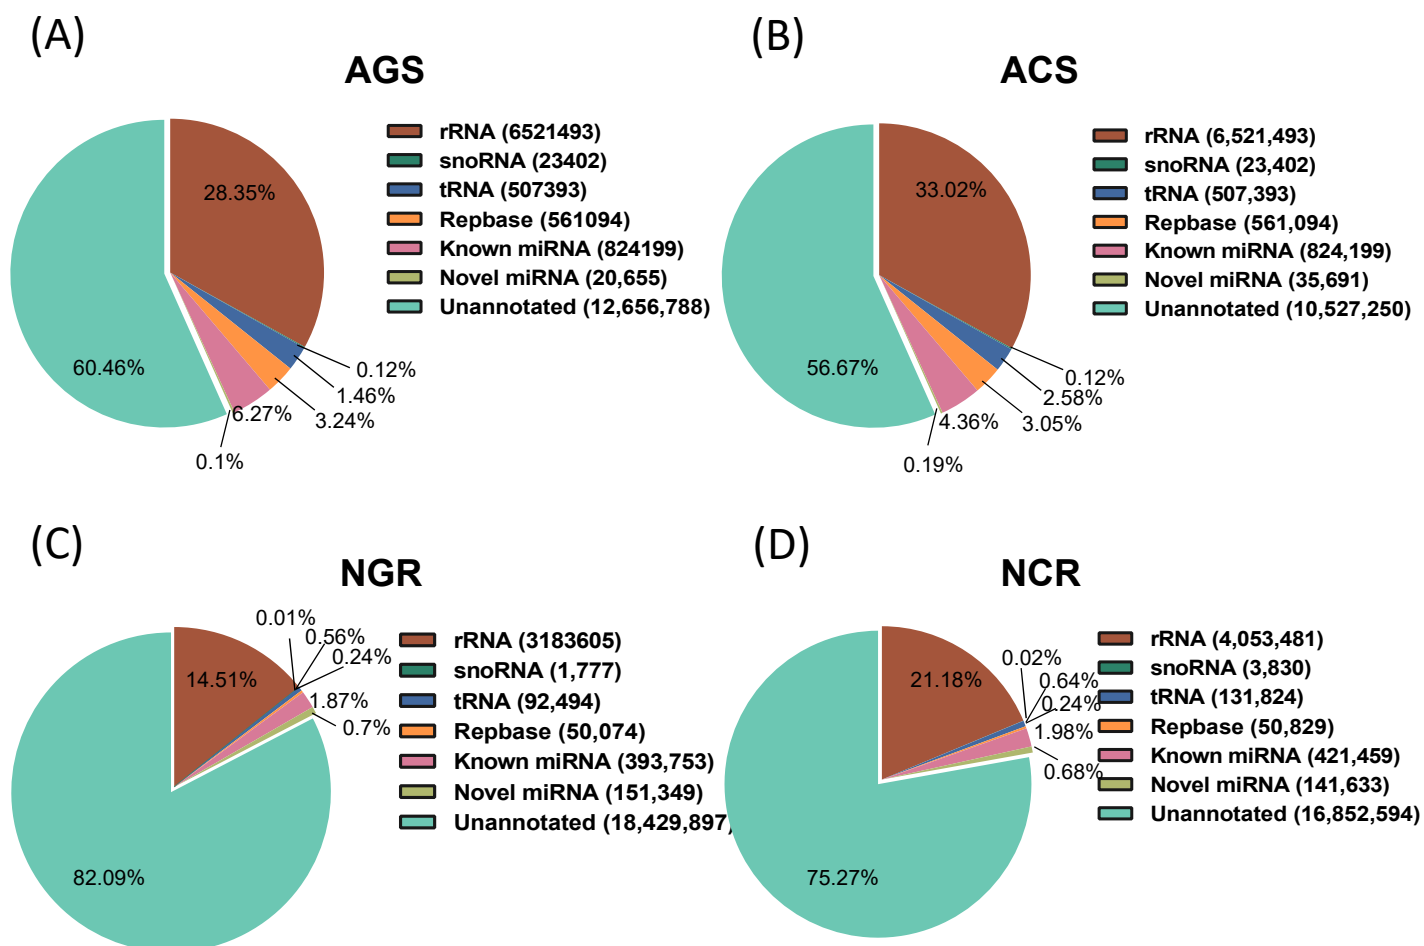

Figure S1. Small RNA classification. (A) Small RNA distribution in AGS library (*At/Nb* scion). (B) Small RNA distribution in ACS library (*At/At* scion). (C) Small RNA distribution in NGR library (*At/Nb* rootstock). (D) Small RNA distribution in NCR library (*Nb/Nb* rootstock).
